# Supplementary material
Source: PubMed Central journal article supplement (PMC4220161)
Supplement: cr2014138x2.pdf [file cr2014138x2.pdf]

A

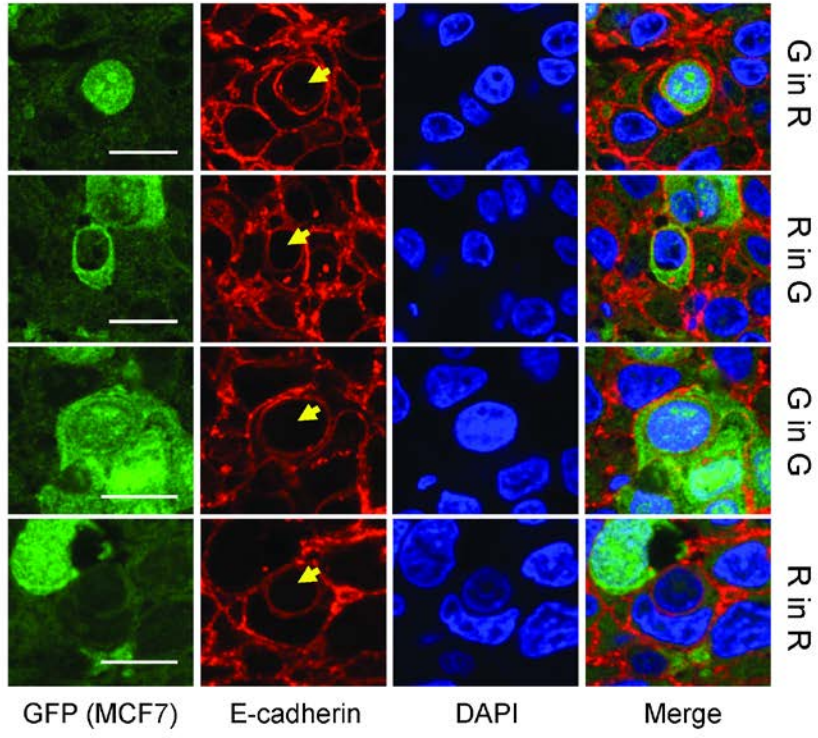

B

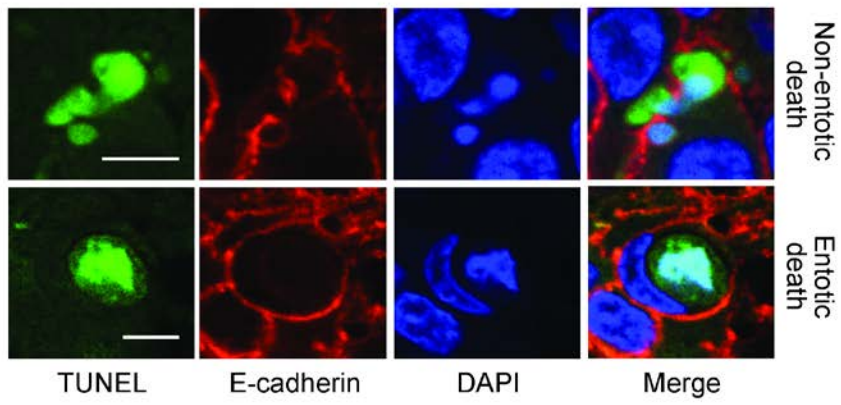

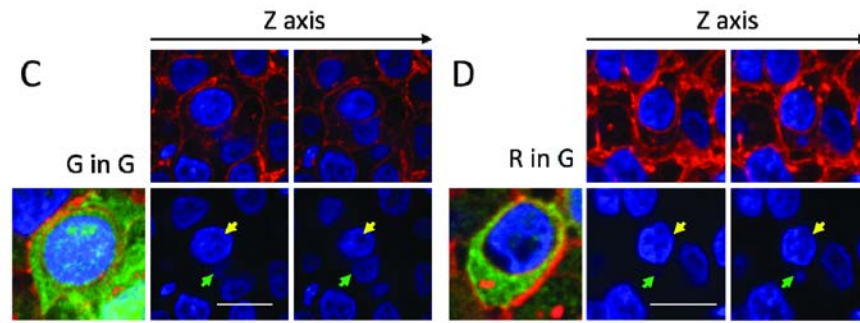

**Supplementary information, Figure S2** Entosis in mixed xenograft tumors. Related to Figure 1.

(A) Entotic cell structures of distinct relationships between MCF7 (green) and VmCUB3 (not green) cells. Image panels show immunofluorescence for GFP (green) and E-cadherin (red), DAPI staining (blue), and merged images. G in R: MCF7 inside of VmCUB3; R in G: VmCUB3 inside of MCF7; G in G: MCF7 inside of MCF7; R in R: VmCUB3 inside of VmCUB3; Arrows indicate internalized cells. Scale bars = 20  $\mu\text{m}$ .

(B) Representative images of cell death in mixed xenograft tumors as detected by TUNEL staining. Top panels show apoptotic cell that is not engulfed. Bottom panels show dying entotic cell that is engulfed. Images show TUNEL staining (green), E-cadherin immunofluorescence (red), and DAPI staining (blue). Scale bars = 10  $\mu\text{m}$ .

(C, D) Nuclei of engulfing cells can be found in different Z planes. C. Right panels show two Z planes of “G in G” structure; D. right panels show two Z planes of “R in G” structure. Yellow arrows indicate the nuclei of inner cells, green arrows indicate the nuclei of outer cells. Note cell-in-cell structures shown here are from Figure 1D. Scale bars = 20  $\mu\text{m}$ .
