# Supplementary material
Source: PubMed Central journal article supplement (PMC4220161)
Supplement: cr2014138x3.pdf [file cr2014138x3.pdf]

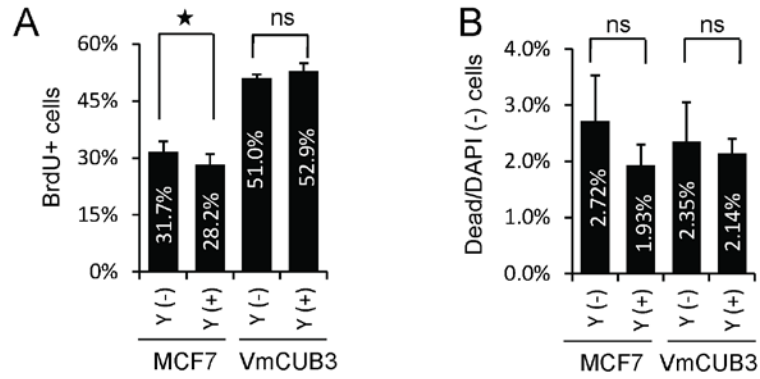

Figure S3

**Supplementary information, Figure S3** Winner cells outcompete losers by entosis in a mixed population. Related to Figure 2.

(A and B) Quantification of cell proliferation (A) and cell death (B) of VmCUB3 and MCF7 co-cultured in suspension for 7 h with or without 10  $\mu$ M Y27632 (Y). Data are mean $\pm$ sd of three experiments; ns: not significant, \*p=0.02. n=1135-3488 cells for each group.
