# Supplementary material
Source: PubMed Central journal article supplement (PMC4220161)
Supplement: cr2014138x5.pdf [file cr2014138x5.pdf]

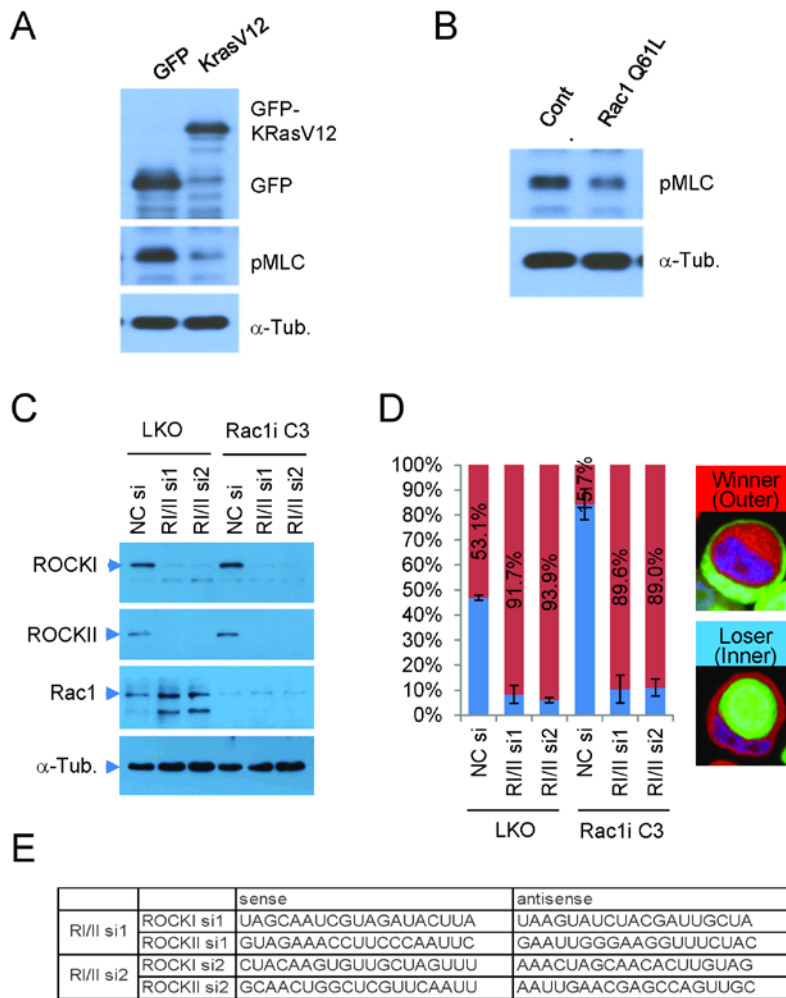

Figure S5

**Supplementary information, Figure S5** Regulation of winner and loser status by oncogenic KrasV12, active Rac1 and ROCKI/II. Related to Figure 5, 6.

(A) Expression of KrasV12 downregulated pMLC2 expression as detected by western blotting.

(B) Expression of active Rac1 downregulated pMLC2 expression as detected by western blotting.

(C) Two individual siRNA duplexes (si1 and si2) for ROCKI and II were used for siRNA-mediated knockdowns. Western shows ROCKI/II and Rac1 knockdowns.

(D) Relative winner or loser status of Rac1-knockdown and ROCKI/II co-depleted cells as in Figure 6C. Data are mean $\pm$ sd of three experiments, n=62-118 entotic structures.

(E) siRNA sequences used to knockdown ROCKI/II.
