# Supplementary material
Source: PubMed Central journal article supplement (PMC4220161)
Supplement: cr2014138x6.pdf [file cr2014138x6.pdf]

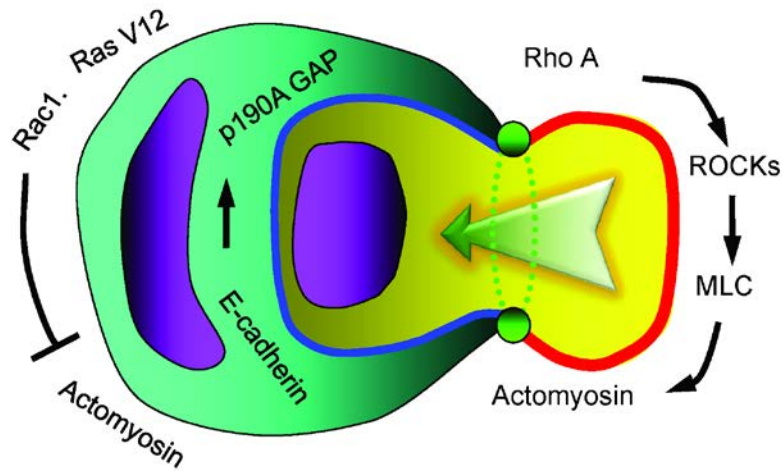

Figure S6

**Supplementary information, Figure S6** Model of molecular machinery controlling cell competition by entosis.

Contraction of actomyosin, regulated by Rho/ROCK signaling at the cortex of internalizing cells, generates inward force that drives cell internalization. Mutant Kras and Rac activation confer winner status to cells by downregulating contractile myosin.
